# Supplementary material
Source: ML conference proceedings conference paper supplement (https://openaccess.thecvf.com/content/CVPR2026/html/Valverde_Towards_High-Quality_Image_CVPR_2026_paper.html)
Supplement: Supplementary file 1 [file Valverde_Towards_High-Quality_Image_CVPR_2026_supplemental.pdf]

# Towards High-Quality Image Segmentation: Improving Topology Accuracy by Penalizing Neighbor Pixels

## Supplementary Material

### A. Implementation (code)

The three-lines implementation of SCNP that we employed in this study. Note that  $Y$  is the one-hot encoded ground truth, stride is always 1, and the padding is determined by the kernel size. Also note that SCNP only needs to be applied during training.

```

1 logits = model(X)
2 # SCNP Begin
3 t1 = -torch.nn.functional.max_pool2d(-(logits*Y +
    9999*(1-Y)), kernel_size=3, stride=1,
    padding=1)
4 t2 = torch.nn.functional.max_pool2d((logits*(1-Y)
    - 9999*Y), kernel_size=3, stride=1, padding
    =1)
5 scnp_logits = t1*Y + t2*(1-Y)
6 # SCNP End
7 loss = CEDiceLoss(softmax(scnp_logits), Y)

```

Listing 1. SCNP implementation.

### B. Computational resources required by loss functions and SCNP

Tables B.1 and B.2 show the running time of one epoch and the GPU memory required by each loss function and our SCNP. These benchmarks were run on a cluster node entirely reserved for computing the measurements, consisting of 2x Intel(R) Xeon(R) Gold 6326 @ 2.90GHz and 1x NVIDIA A10 with 24GB. For SCNP, we computed the difference in resources when optimizing  $\mathcal{L}_{CEDice}$  and  $\mathcal{L}_{CEDice}^{SCNP}$ .

We benchmarked all methods on FIVES (2D) and PulmonaryVA (3D). The size of the tensors sent to the model were  $2 \times 2 \times 1280 \times 1024$  and  $2 \times 3 \times 160 \times 128 \times 112$  on FIVES and PulmonaryVA, respectively. An epoch consisted on 300 training iterations; on FIVES that amounted to 2100 forward passes, whereas on PulmonaryVA it amounted to 1200 forward passes. This is due to the use of Deep supervision and different models that were automatically configured by nnUNetv2.

### C. Gradients

The derivative of a loss function w.r.t. the logits can be obtained via the chain rule

$$\frac{\partial \mathcal{L}}{\partial z_{ki}} = \frac{\partial \mathcal{L}}{\partial \hat{y}_{ki}} \cdot \frac{\partial \hat{y}_{ki}}{\partial z_{ki}}, \quad (1)$$

where the first term is the derivative of the loss w.r.t. the sigmoid/softmax normalized predictions, and the second term

| Loss                         | Epoch time (sec.) | GPU (MiB) |
|------------------------------|-------------------|-----------|
| CEDice                       | 54.85             | 5350      |
| clDice ( $i = 24$ )          | 181.78            | 19340     |
| SkelRecall                   | 115.59            | 5334      |
| TopoLoss                     | 1505              | 5334      |
| RWLoss                       | 56.59             | 5778      |
| Tversky ( $\beta = 0.7$ )    | 54.76             | 5326      |
| Focal                        | 55.26             | 5678      |
| Extra resources required by: |                   |           |
| SCNP                         | +1.47             | +340      |

Table B.1. Resources required on FIVES (2D nnUNetv2).

| Loss                         | Iteration time (sec.) | GPU (MiB) |
|------------------------------|-----------------------|-----------|
| CEDice                       | 72.79                 | 6644      |
| clDice ( $i = 16$ )          | 199.10                | 38672     |
| SkelRecall                   | 157.17                | 7784      |
| TopoLoss                     | 12960                 | 6632      |
| RWLoss                       | 79.42                 | 6864      |
| Tversky ( $\beta = 0.6$ )    | 73.02                 | 6644      |
| Focal                        | 70.65                 | 6778      |
| Extra resources required by: |                       |           |
| SCNP                         | +0.66                 | +454      |

Table B.2. Resources required on PulmonaryVA (3D nnUNetv2).

is the derivative of the normalized predictions w.r.t. the un-normalized predictions (the logits  $\mathbf{Z}$ ). Softmax normalization couples the gradients at a particular pixel location across all classes

$$\frac{\partial \hat{y}_{ki}}{\partial z_{ki}} = \hat{y}_{ki}(\delta_{ck,i} - \hat{y}_{ci}), \quad (2)$$

where  $\delta_{ck,i}$  is the Kronecker delta, which is 1 if  $k = c$  at pixel  $i$  and 0 otherwise. This is because each individual value will depend on the logits at that pixel location across all classes. Sigmoid normalization, in contrast, does not have this coupling effect, as sigmoid is applied individually and independently to each logit:

$$\frac{\partial \hat{y}_{ki}}{\partial z_{ki}} = \hat{y}_{ki}(1 - \hat{y}_{ki}). \quad (3)$$

The derivative of Cross entropy loss is

$$\frac{\partial \mathcal{L}_{CE}}{\partial \hat{y}_{ki}} = -\frac{y_{ki}}{\hat{y}_{ki}}, \quad (4)$$

where we can observe that the gradient at a pixel location depends on the values of the prediction and the ground truth at that pixel. The derivative of Focal loss is

$$\frac{\partial \mathcal{L}_{Focal}}{\partial \hat{y}_{ki}} = \alpha y_{ki} \left[ \gamma (1 - \hat{y}_{ki})^{\gamma-1} \log(\hat{y}_{ki}) - \frac{(1 - \hat{y}_{ki})^\gamma}{\hat{y}_{ki}} \right], \quad (5)$$

where  $\alpha$  weighs the overall contribution of Focal loss, and  $\gamma$  controls the penalization over uncertain predictions. As a loss function modified from Cross entropy, the gradients provided by Focal loss at a particular pixel also depend on the pixel and the ground truth itself, plus on the two other hyper-parameters ( $\alpha, \gamma$ ). The derivative of Dice loss is

$$\frac{\partial \mathcal{L}_{Dice}}{\partial \hat{y}_{ki}} = -\frac{2}{CB_k^2} (y_{ki} B_k - A_k), \quad (6)$$

where  $C$  is the number of classes, and  $B_k$  and  $A_k$  are the union and intersection, respectively, between predictions and ground truth of class  $k$ . In Equation (6), we can observe that the gradients from Dice loss (similarly to other metric-based loss functions such as Tversky loss [42]) do not depend on the pixel prediction but on the ground truth at the pixel itself and on global statistics involving the number of true/false positives and true/false negatives.

Note how optimizing jointly Cross entropy and Dice loss applied to softmax probability values, which is the most common approach in domains such as in medical image segmentation, couples 1) pixel predictions across all classes (*i.e.*,  $\hat{y}_{ci} \forall c \in \{1, \dots, C\}$ ), 2) their ground truth ( $y_{ki}$ ), and 3) global statistics ( $A, B$  in Eq. (6)). Optimizing a loss function with the SCNP logits will, in addition, couple predictions from neighboring pixels across all classes by adding the following term to the chain rule:

$$\frac{\partial \tilde{z}_{ki}}{\partial z_{ki}} = \sum_{j \in \Omega(i)} \mathbf{1}[z_{ki} = \tilde{z}_{kj}] \frac{\partial \mathcal{L}}{\partial \tilde{z}_{kj}}, \quad (7)$$

where  $\mathbf{1}[\cdot]$  is 1 if the inner condition is true and 0 otherwise.

### C.1. Example

Let us compute the gradients at the pixel corresponding to the yellow logits (Figure 3, Paper). With  $\frac{\partial \mathcal{L}_{CE}}{\partial \tilde{z}_{ki}} = \hat{y}_{ki} - y_{ki}$ , the gradients at  $ki$  are:

$$\begin{aligned} \nabla_{z_{ki}} \mathcal{L}_{CE} &= [(.50 - 1) + (.56 - 1), \\ &\quad (.23 - 0) + (.21 - 0) + (.19 - 0), \\ &\quad (.20 - 0) + (.24 - 0)] \\ &= [-.94, .63, .44] \end{aligned} \quad (8)$$

## D. SCNP’s negligible delay in convergence

Since SCNP switches the focus of the optimization from improving all pixels to improving the worst neighbors, we

investigated whether and to what extent SCNP delays convergence. Figure D.1 shows, in two loss functions (Cross Entropy and Dice loss), 1) that the delay in convergence due to optimizing the SCNP logits alone is negligible, and 2) that such delay can be further reduced by optimizing the SCNP logits jointly with the standard logits.

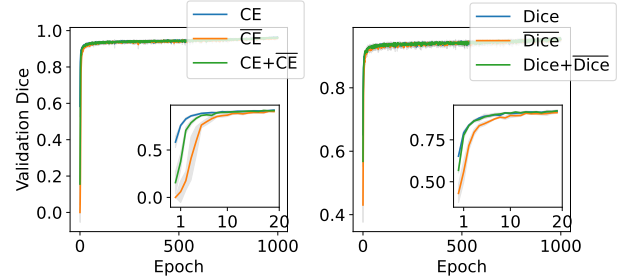

Figure D.1. Left: Convergence plot when optimizing Cross entropy over the standard logits, the SCNP logits, and both. Right: Same scenario with Dice loss. The small plots inside the two panels are a zoomed in on the first 20 epochs.

## E. SCNP vs. Binary closing

We investigated the effectiveness of binary closing ( $\bullet$ ) by applying it to CEDice segmentations on four datasets (one per group). We used kernels of size 3, 5, 7 (2D & 3D), and we applied binary closing until convergence. Below, we report the best  $\beta_{0e}$  (*i.e.* accuracy in the number of structures), which indicates topology accuracy.

| Dataset        | CEDice           | $\bullet$ (CEDice) | SCNP (CEDice)                   |
|----------------|------------------|--------------------|---------------------------------|
| FIVES          | 10.82 $\pm$ 2.71 | 8.79 $\pm$ 2.47    | <b>6.94<math>\pm</math>1.47</b> |
| DeepGlobeRoads | 11.77 $\pm$ 3.17 | 9.92 $\pm$ 2.83    | <b>6.56<math>\pm</math>2.25</b> |
| CirrMRI600     | 0.27 $\pm$ 0.26  | 0.19 $\pm$ 0.13    | <b>0.12<math>\pm</math>0.05</b> |
| NuInsSeg       | 8.18 $\pm$ 2.39  | 8.17 $\pm$ 2.40    | <b>7.53<math>\pm</math>2.20</b> |

Table E.3. Average  $\beta_{0e}$  in four datasets when optimizing CEDice (second column) and after applying binary closing (third column), and when optimizing CEDice with the SCNP logits (fourth column).  $\bullet$ : Binary closing.

Although binary closing improved  $\beta_{0e}$ , SCNP remained superior. Furthermore, note that binary closing is a hurdle or ineffective in instance segmentation, real-time applications, tubular structures that are very close, and it requires a ground truth to find the optimal kernel size and number of iterations.

## F. Comparison with cICE

We run extra experiments with [2]’s loss on FIVES, as FIVES was also used in [2]. cICE loss achieved: Dice 0.93 $\pm$ 0.00,  $\beta_{0e}$  10.62 $\pm$ 3.05, cIDice 0.92 $\pm$ 0.00, with our SCNP remaining more effective (same Dice, cIDice,  $\beta_{0e}$ : **6.94 $\pm$ 1.47**).

Figure F.2 shows a visual comparison in two representative images.

## **G. Datasets description**

Tables G.4 to G.7 list the details of the datasets used in this study, including an image/slice of each dataset and their size and split.

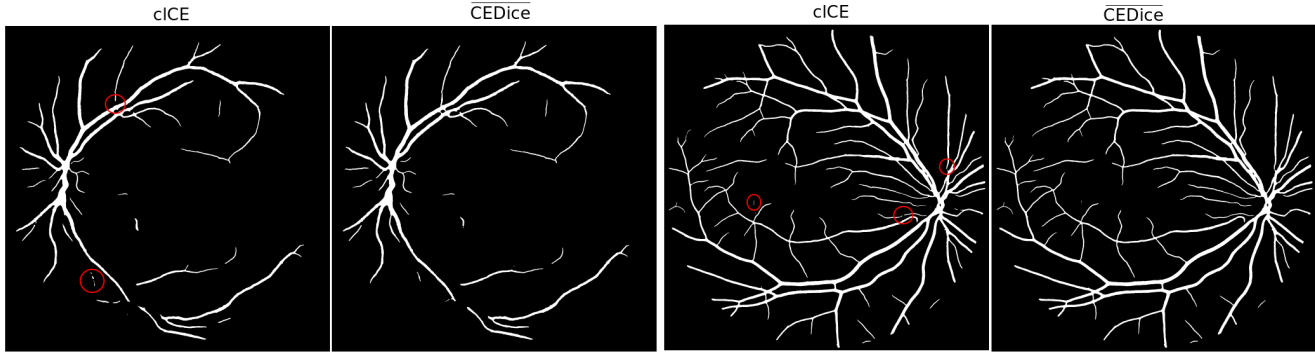

Figure F.2. Visual comparison between cICE and  $\overline{CEDice}$ . Red circle: topological errors.

|             |                                                                                     |                                                                                                                                                                                                                                                                                                                                                                                                                                                                          |
|-------------|-------------------------------------------------------------------------------------|--------------------------------------------------------------------------------------------------------------------------------------------------------------------------------------------------------------------------------------------------------------------------------------------------------------------------------------------------------------------------------------------------------------------------------------------------------------------------|
| FIVES       |   | <ul style="list-style-type: none"> <li>• <u>Blood vessels</u> in fundus retina images</li> <li>• Semantic segmentation</li> <li>• R,G,B</li> <li>• <math>2048 \times 2048</math> pixels</li> </ul> <p>Splits: 480-120-200 (train, validation, test)</p>                                                                                                                                                                                                                  |
| PulmonaryVA |  | <ul style="list-style-type: none"> <li>• <u>Pulmonary arteries and veins</u> in chest CT scans</li> <li>• Semantic segmentation</li> <li>• CT</li> <li>• <math>184 \times 235 \times 262.5</math> voxels (median)</li> </ul> <p>Dataset size: 106 (five-fold cross validation)</p>                                                                                                                                                                                       |
| Axons       |  | <ul style="list-style-type: none"> <li>• <u>Axons</u> in mouse brain</li> <li>• Semantic segmentation</li> <li>• Electron-microscopy</li> <li>• <math>1062.5 \times 1067 \times 285</math> voxels (median)</li> </ul> <p>Dataset size: 10 (five-fold cross validation)<br/>           Sham_HM_25_contra—ipsi,<br/>           Sham_HM_49_contra—ipsi,<br/>           TBI_HM_24_contra—ipsi,<br/>           TBI_HM_28_contra—ipsi,<br/>           TBI_HM_2_contra—ipsi</p> |

Table G.4. Medical datasets with tubular structures (nnUNetv2 framework, Group ①)

|                |                                                                                     |                                                                                                                                                                                                 |                                                    |
|----------------|-------------------------------------------------------------------------------------|-------------------------------------------------------------------------------------------------------------------------------------------------------------------------------------------------|----------------------------------------------------|
| TopoMortar     |    | <ul style="list-style-type: none"> <li>• <u>Mortar</u> in red brick wall images</li> <li>• Semantic segmentation</li> <li>• R,G,B</li> <li>• <math>512 \times 512</math> pixels</li> </ul>      | Splits: 50-20-350<br>(train, validation, test)     |
| Crack500       |   | <ul style="list-style-type: none"> <li>• <u>Cracks</u> in concrete images</li> <li>• Semantic segmentation</li> <li>• R,G,B</li> <li>• <math>640 \times 896</math> Pixels (median)</li> </ul>   | Splits: 250-50-200<br>(train, validation, test)    |
| DeepGlobeRoads |  | <ul style="list-style-type: none"> <li>• <u>Roads</u> in satellite images</li> <li>• Semantic segmentation</li> <li>• R,G,B</li> <li>• <math>1024 \times 1024</math> pixels (median)</li> </ul> | Splits: 4357-623-1246<br>(train, validation, test) |

Table G.5. Non-medical datasets with tubular structures (Detectron2+DeepLabv3+ framework, Group ②)

|             |                                                                                     |                                                                                                                                                                                                                                 |                                                   |
|-------------|-------------------------------------------------------------------------------------|---------------------------------------------------------------------------------------------------------------------------------------------------------------------------------------------------------------------------------|---------------------------------------------------|
| CirriMRI600 |    | <ul style="list-style-type: none"> <li>• <u>Cirrhotic liver</u> in MRI</li> <li>• Semantic segmentation</li> <li>• T2w</li> <li>• <math>320 \times 260 \times 80</math> voxels (median)</li> </ul>                              | Splits: 198-50-31<br>(train, validation, test)    |
| ATLAS2      |   | <ul style="list-style-type: none"> <li>• <u>Lesion</u> in brain MRI</li> <li>• Semantic segmentation</li> <li>• T1w</li> <li>• <math>197 \times 233 \times 189</math> voxels (median)</li> </ul>                                | Dataset size: 655<br>(five-fold cross validation) |
| ISLES24     |  | <ul style="list-style-type: none"> <li>• <u>Ischemic lesion</u> in brain MRI</li> <li>• Semantic segmentation</li> <li>• ADC, DWI</li> <li>• <math>512 \times 581 \times 69</math> voxels (median)</li> </ul>                   | Dataset size: 149<br>(five-fold cross validation) |
| MSLesSeg    |  | <ul style="list-style-type: none"> <li>• <u>Multiple sclerosis lesion</u> in brain MRI</li> <li>• Semantic segmentation</li> <li>• T1w, T2w, FLAIR</li> <li>• <math>182 \times 218 \times 182</math> voxels (median)</li> </ul> | Splits: 74-19-22<br>(train, validation, test)     |

Table G.6. Medical datasets with non-tubular structures (nnUNetv2 framework, Group ③)

|          |                                                                                     |                                                                                                                                                                                                                                 |                                                |
|----------|-------------------------------------------------------------------------------------|---------------------------------------------------------------------------------------------------------------------------------------------------------------------------------------------------------------------------------|------------------------------------------------|
| NuInsSeg | 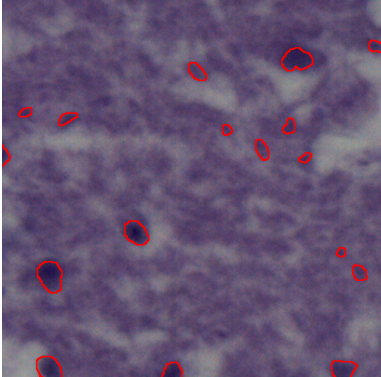   | <ul style="list-style-type: none"> <li>• <u>Cell nuclei</u> in H&amp;E-stained histological images</li> <li>• Instance segmentation</li> <li>• R,G,B</li> <li>• <math>512 \times 512</math> pixels (median)</li> </ul>          | Splits: 532-66-67<br>(train, validation, test) |
| IHC_TMA  |   | <ul style="list-style-type: none"> <li>• <u>Cell nuclei</u> in immunohistochemical tissue microarray images</li> <li>• Instance segmentation</li> <li>• R,G,B</li> <li>• <math>256 \times 256</math> pixels (median)</li> </ul> | Splits: 212-27-27<br>(train, validation, test) |
| LyNSeC   |  | <ul style="list-style-type: none"> <li>• <u>Lymphoma nuclei</u> in H&amp;E-stained histological images</li> <li>• Instance segmentation</li> <li>• R,G,B</li> <li>• <math>512 \times 512</math> pixels (median)</li> </ul>      | Splits: 559-70-70<br>(train, validation, test) |

Table G.7. Medical (cells) datasets with rounded structures (InstanSeg framework, Group ④)

## H. Optimization

We left the frameworks’ optimization strategy as it was by default.

**nnUNetv2** employs SGD with Nesterov momentum (0.99), a weight decay of  $3e-5$ , initial learning rate of 0.01, and the following learning rate scheduler:  $\eta_{it} = \eta_0 \left(\frac{1-it}{iterations}\right)^{0.9}$ . Models were optimized for 1000 epochs.

**Detectron2** employs AdamW [29] with an initial learning rate of 0.001,  $\beta_1 = 0.9$ ,  $\beta_2 = 0.999$ , a weight decay of 0.1, and cosine annealing as learning rate scheduler. Models were optimized for 12000 iterations.

**InstanSeg** employs Adam [23] with an initial learning rate of 0.001. Models were optimized for 500, 150 and 500 epochs in NuInsSeg, IHC\_TMA, and LyNSeC, respectively.

### H.1. Loss functions and their hyper-parameters

**Cross Entropy Dice loss (CEDice)** We summed Cross Entropy and Dice loss:  $\mathcal{L}_{CEDice} = \mathcal{L}_{CE} + \mathcal{L}_{Dice}$ .

**clDice loss** We employed the official code provided by Shit et al. [44] and, as in the original study, we combined clDice with Dice loss. Since clDice’s effectiveness depends on the suitability of the hyper-parameter “number of iterations” ( $i$ ) of its soft-skeletonization method, we conducted hyper-parameter optimization. For each dataset, we explored five different values that were selected based on the thickness of the tubular structures while limiting the GPU memory usage to 80GB. The values that we explored in each dataset (and the **selected** hyper-parameter) were:

- FIVES: 8, 16, **24**, 32, 40.
- PulmonaryVA: 4, 8, 12, **16**, 18.
- Axons: 9, 18, **27**, 36, **46**.
- TopoMortar: **4**, 8, 12, 16, 18.
- Crack500: **10**, 20, 30, 40, 51.
- DeepGlobeRoads: 15, 30, **45**, 60, 72.

**Skeleton Recall (SkelRecall)** We employed the official code provided by Kirchhoff et al. [24] and, as in the original study, we combined SkelRecall with Cross Entropy loss.

**TopoLoss** We employed the official code provided by Hu et al. [17]. As suggested in the original work, we first optimized Cross Entropy loss and, at the end of the optimization, we combined it with TopoLoss. Since TopoLoss computes persistence homology, the iteration time increased dramatically, especially for the 3D datasets. Therefore, we set the number of iterations that we optimized TopoLoss such that the total training time did not exceed 24 hours. Table H.8 summarizes this.

**RegionWise (RWLoss)** We employed the official code provided by Valverde and Tohka [47].

| Dataset        | Eps. w/ TopoLoss | % of train time |
|----------------|------------------|-----------------|
| FIVES          | 38 (1000)        | 44.20%          |
| PulmonaryVA    | 3 (1000)         | 34.30%          |
| Axons          | 5 (1000)         | 51.88%          |
| TopoMortar     | 3600 (12000)     | 87.86%          |
| Crack500       | 3600 (12000)     | 62.65%          |
| DeepGlobeRoads | 3600 (12000)     | 41.50%          |
| CirrMRI600     | 5 (1000)         | 39.11%          |
| ATLAS2         | 12 (1000)        | 37.16%          |
| ISLES24        | 12 (1000)        | 63.35%          |
| MSLesSeg       | 5 (1000)         | 36.81%          |
| NuInsSeg       | 150 (500)        | 36.80%          |
| IHC_TMA        | 15 (150)         | 34.41%          |
| LyNSeC         | 150 (500)        | 53.72%          |

Table H.8. Second column: Epochs optimizing TopoLoss and total epochs. Third column: Percentage of training time optimizing TopoLoss relative to the total training time (average across the five runs).

**Focal loss** We employed MONAI’s implementation [3] of Focal loss [27], using its default hyper-parameters.

**Tversky loss** We employed MONAI’s implementation [3] of Tversky loss [42], and we optimized its hyper-parameters  $\alpha, \beta$  which control the penalty for false positives and negatives.

## I. Performance metrics

Tables I.9 to I.12 show the results obtained by CEDice (our baseline), CEDice optimizing the SCNP-penalized logits, their combination, and several loss function, on the 13 datasets used in this study. Furthermore, we assess the statistical significance of SCNP-derived performance metrics compared to the baseline CEDice with a permutation t-test based on 10,000 random permutations ( $p < 0.05$ ).

For the datasets with a pre-defined train-test split (Appendix G), we report the mean and standard deviation on the same test-set images across five runs; for the remaining datasets, we report the mean and standard deviation across the five-fold cross validation runs. In consequence, the standard deviation in the first group of datasets indicates algorithmic variance while in the second group it indicates intra-dataset variance. Appendix J presents a qualitative comparison of segmentations.

|              | Loss                                                            | Dice                           | $\beta_{0e}$                    | clDice          |
|--------------|-----------------------------------------------------------------|--------------------------------|---------------------------------|-----------------|
| FIVES        | CEDice                                                          | 0.92 $\pm$ 0.0                 | 10.82 $\pm$ 2.71                | 0.92 $\pm$ 0.0  |
|              | clDice ( $i = 24$ )                                             | 0.91 $\pm$ 0.0                 | 36.55 $\pm$ 10.70               | 0.91 $\pm$ 0.01 |
|              | SkelRecall                                                      | 0.91 $\pm$ 0.0                 | 12.45 $\pm$ 4.25                | 0.91 $\pm$ 0.0  |
|              | TopoLoss                                                        | 0.92 $\pm$ 0.0                 | 8.09 $\pm$ 2.45                 | 0.92 $\pm$ 0.0  |
|              | RWLoss                                                          | 0.92 $\pm$ 0.0                 | 15.99 $\pm$ 5.35                | 0.92 $\pm$ 0.0  |
|              | Tversky ( $\beta = 0.7$ )                                       | 0.92 $\pm$ 0.0                 | 12.22 $\pm$ 3.45                | 0.92 $\pm$ 0.0  |
|              | Focal                                                           | 0.92 $\pm$ 0.0                 | 16.08 $\pm$ 5.97                | 0.92 $\pm$ 0.0  |
|              | $\overline{\text{CEDice+CEDice}}$<br>$\overline{\text{CEDice}}$ | <b>0.93<math>\pm</math>0.0</b> | 7.95 $\pm$ 1.82                 | 0.92 $\pm$ 0.0  |
| Pulmonary VA | CEDice                                                          | 0.84 $\pm$ 0.04                | 12.89 $\pm$ 12.92               | 0.88 $\pm$ 0.04 |
|              | clDice ( $i = 16$ )                                             | 0.84 $\pm$ 0.04                | 15.98 $\pm$ 8.73                | 0.89 $\pm$ 0.04 |
|              | SkelRecall                                                      | 0.83 $\pm$ 0.05                | 39.45 $\pm$ 20.42               | 0.84 $\pm$ 0.06 |
|              | TopoLoss                                                        | 0.84 $\pm$ 0.05                | 14.44 $\pm$ 10.67               | 0.88 $\pm$ 0.04 |
|              | RWLoss                                                          | 0.84 $\pm$ 0.05                | 18.02 $\pm$ 13.83               | 0.87 $\pm$ 0.04 |
|              | Tversky ( $\beta = 0.6$ )                                       | 0.84 $\pm$ 0.05                | 15.44 $\pm$ 14.87               | 0.88 $\pm$ 0.04 |
|              | Focal                                                           | 0.84 $\pm$ 0.05                | 21.29 $\pm$ 13.4                | 0.87 $\pm$ 0.04 |
|              | $\overline{\text{CEDice+CEDice}}$<br>$\overline{\text{CEDice}}$ | 0.84 $\pm$ 0.05                | <b>5.82<math>\pm</math>5.02</b> | 0.87 $\pm$ 0.06 |
| Axons        | CEDice                                                          | 0.90 $\pm$ 0.04                | 531 $\pm$ 534                   | 0.85 $\pm$ 0.05 |
|              | clDice ( $i = 46$ )                                             | 0.89 $\pm$ 0.04                | 1925 $\pm$ 1701                 | 0.86 $\pm$ 0.04 |
|              | SkelRecall                                                      | 0.89 $\pm$ 0.04                | 1578 $\pm$ 900                  | 0.85 $\pm$ 0.05 |
|              | TopoLoss                                                        | 0.90 $\pm$ 0.04                | 539 $\pm$ 490                   | 0.85 $\pm$ 0.05 |
|              | RWLoss                                                          | 0.90 $\pm$ 0.04                | 408 $\pm$ 412                   | 0.85 $\pm$ 0.05 |
|              | Tversky ( $\beta = 0.6$ )                                       | 0.90 $\pm$ 0.04                | 530 $\pm$ 623                   | 0.85 $\pm$ 0.05 |
|              | Focal                                                           | 0.90 $\pm$ 0.04                | 412 $\pm$ 400                   | 0.85 $\pm$ 0.05 |
|              | $\overline{\text{CEDice+CEDice}}$<br>$\overline{\text{CEDice}}$ | 0.90 $\pm$ 0.04                | 254 $\pm$ 203                   | 0.87 $\pm$ 0.05 |
|              | 0.90 $\pm$ 0.04                                                 | 279 $\pm$ 207                  | 0.88 $\pm$ 0.05                 |                 |

Table I.9. Group ① Medical datasets with tubular structures (nnUNetv2).  $\overline{\text{CEDice}}$ : CEDice applied to SCNP. Bold (Dice): Highest and significantly significant. Bold ( $\beta_{0e}$ , clDice): Best scores with Dice equal or better and statistically significant.

|                | Loss                                                            | Dice            | $\beta_{0e}$      | clDice          |
|----------------|-----------------------------------------------------------------|-----------------|-------------------|-----------------|
| TopoMortar     | CEDice                                                          | 0.67 $\pm$ 0.03 | 25.06 $\pm$ 9.26  | 0.75 $\pm$ 0.03 |
|                | clDice ( $i = 4$ )                                              | 0.68 $\pm$ 0.02 | 21.40 $\pm$ 5.86  | 0.75 $\pm$ 0.02 |
|                | SkelRecall                                                      | 0.68 $\pm$ 0.02 | 23.64 $\pm$ 7.30  | 0.76 $\pm$ 0.02 |
|                | TopoLoss                                                        | 0.67 $\pm$ 0.02 | 27.22 $\pm$ 7.64  | 0.74 $\pm$ 0.02 |
|                | RWLoss                                                          | 0.54 $\pm$ 0.30 | 19.40 $\pm$ 13.80 | 0.76 $\pm$ 0.03 |
|                | Tversky ( $\beta = 0.8$ )                                       | 0.68 $\pm$ 0.02 | 22.59 $\pm$ 6.46  | 0.75 $\pm$ 0.02 |
|                | Focal                                                           | 0.67 $\pm$ 0.02 | 29.75 $\pm$ 10.17 | 0.74 $\pm$ 0.02 |
|                | $\overline{\text{CEDice+CEDice}}$<br>$\overline{\text{CEDice}}$ | 0.68 $\pm$ 0.02 | 20.86 $\pm$ 6.78  | 0.76 $\pm$ 0.02 |
| Crack500       | CEDice                                                          | 0.68 $\pm$ 0.03 | 10.61 $\pm$ 3.44  | 0.76 $\pm$ 0.03 |
|                | clDice ( $i = 10$ )                                             | 0.65 $\pm$ 0.09 | 9.98 $\pm$ 2.96   | 0.80 $\pm$ 0.04 |
|                | SkelRecall                                                      | 0.65 $\pm$ 0.02 | 11.78 $\pm$ 3.22  | 0.77 $\pm$ 0.02 |
|                | TopoLoss                                                        | 0.54 $\pm$ 0.04 | 13.34 $\pm$ 3.24  | 0.58 $\pm$ 0.04 |
|                | RWLoss                                                          | —               | —                 | —               |
|                | Tversky ( $\beta = 0.6$ )                                       | 0.69 $\pm$ 0.02 | 10.47 $\pm$ 3.67  | 0.77 $\pm$ 0.03 |
|                | Focal                                                           | —               | —                 | —               |
|                | $\overline{\text{CEDice+CEDice}}$<br>$\overline{\text{CEDice}}$ | 0.68 $\pm$ 0.03 | 9.32 $\pm$ 2.71   | 0.76 $\pm$ 0.03 |
| DeepGlobeRoads | CEDice                                                          | 0.75 $\pm$ 0.02 | 11.77 $\pm$ 3.17  | 0.82 $\pm$ 0.02 |
|                | clDice ( $i = 45$ )                                             | 0.72 $\pm$ 0.03 | 6.51 $\pm$ 2.41   | 0.82 $\pm$ 0.03 |
|                | SkelRecall                                                      | 0.71 $\pm$ 0.02 | 15.26 $\pm$ 4.12  | 0.79 $\pm$ 0.02 |
|                | TopoLoss                                                        | 0.22 $\pm$ 0.05 | 27.79 $\pm$ 6.04  | 0.33 $\pm$ 0.06 |
|                | RWLoss                                                          | —               | —                 | —               |
|                | Tversky ( $\beta = 0.7$ )                                       | 0.74 $\pm$ 0.02 | 9.78 $\pm$ 2.90   | 0.82 $\pm$ 0.02 |
|                | Focal                                                           | —               | —                 | —               |
|                | $\overline{\text{CEDice+CEDice}}$<br>$\overline{\text{CEDice}}$ | 0.72 $\pm$ 0.03 | 7.24 $\pm$ 2.63   | 0.80 $\pm$ 0.03 |
|                | 0.70 $\pm$ 0.03                                                 | 6.56 $\pm$ 2.25 | 0.78 $\pm$ 0.03   |                 |

Table I.10. Group ② Non-medical datasets with tubular structures (Detectron2+DeepLabv3+).

|            | Loss                                                            | Dice             | $\beta_{0e}$     |
|------------|-----------------------------------------------------------------|------------------|------------------|
| CirrMRI600 | CEDice                                                          | 0.97 $\pm$ 0.01  | 0.27 $\pm$ 0.26  |
|            | TopoLoss                                                        | 0.97 $\pm$ 0.01  | 0.32 $\pm$ 0.28  |
|            | RWLoss                                                          | 0.96 $\pm$ 0.01  | 0.43 $\pm$ 0.31  |
|            | Tversky ( $\beta = 0.7$ )                                       | 0.95 $\pm$ 0.0   | 1.39 $\pm$ 1.49  |
|            | Focal                                                           | 0.97 $\pm$ 0.01  | 0.51 $\pm$ 0.30  |
|            | $\overline{\text{CEDice+CEDice}}$<br>$\overline{\text{CEDice}}$ | 0.97 $\pm$ 0.01  | 0.17 $\pm$ 0.09  |
| ATLAS2     | CEDice                                                          | 0.63 $\pm$ 0.28  | 1.60 $\pm$ 2.5   |
|            | TopoLoss                                                        | 0.61 $\pm$ 0.30  | 1.45 $\pm$ 2.42  |
|            | RWLoss                                                          | 0.56 $\pm$ 0.33  | 1.44 $\pm$ 2.47  |
|            | Tversky ( $\beta = 0.8$ )                                       | 0.61 $\pm$ 0.26  | 2.37 $\pm$ 3.15  |
|            | Focal                                                           | 0.59 $\pm$ 0.32  | 1.39 $\pm$ 2.51  |
|            | $\overline{\text{CEDice+CEDice}}$<br>$\overline{\text{CEDice}}$ | 0.62 $\pm$ 0.27  | 1.40 $\pm$ 2.49  |
| ISLES24    | CEDice                                                          | 0.77 $\pm$ 0.20  | 3.64 $\pm$ 4.39  |
|            | TopoLoss                                                        | 0.77 $\pm$ 0.20  | 3.77 $\pm$ 5.06  |
|            | RWLoss                                                          | 0.77 $\pm$ 0.20  | 3.92 $\pm$ 5.03  |
|            | Tversky ( $\beta = 0.7$ )                                       | 0.77 $\pm$ 0.19  | 4.61 $\pm$ 7.65  |
|            | Focal                                                           | 0.76 $\pm$ 0.21  | 4.32 $\pm$ 6.30  |
|            | $\overline{\text{CEDice+CEDice}}$<br>$\overline{\text{CEDice}}$ | 0.77 $\pm$ 0.19  | 3.72 $\pm$ 5.40  |
| MSLesSeg   | CEDice                                                          | 0.71 $\pm$ 0.01  | 9.47 $\pm$ 1.81  |
|            | TopoLoss                                                        | 0.71 $\pm$ 0.01  | 9.40 $\pm$ 1.84  |
|            | RWLoss                                                          | 0.70 $\pm$ 0.01  | 10.22 $\pm$ 1.64 |
|            | Tversky ( $\beta = 0.8$ )                                       | 0.71 $\pm$ 0.01  | 9.55 $\pm$ 2.14  |
|            | Focal                                                           | 0.69 $\pm$ 0.02  | 10.06 $\pm$ 2.27 |
|            | $\overline{\text{CEDice+CEDice}}$<br>$\overline{\text{CEDice}}$ | 0.70 $\pm$ 0.01  | 12.72 $\pm$ 1.54 |
|            | 0.67 $\pm$ 0.01                                                 | 23.05 $\pm$ 1.22 |                  |

Table I.11. Group ③ Medical datasets with non-tubular structures (nnUNetv2).

|          | Loss                                                            | Dice            | $\beta_{0e}$                   | ( $\mathcal{R}_e$ )            |
|----------|-----------------------------------------------------------------|-----------------|--------------------------------|--------------------------------|
| NuInsSeg | CEDice                                                          | 0.76 $\pm$ 0.04 | 8.18 $\pm$ 2.39                | 0.91 $\pm$ 0.01                |
|          | TopoLoss                                                        | 0.28 $\pm$ 0.01 | 13.35 $\pm$ 9.23               | 0.76 $\pm$ 0.04                |
|          | RWLoss                                                          | 0.72 $\pm$ 0.04 | 8.42 $\pm$ 3.04                | 0.90 $\pm$ 0.01                |
|          | Tversky ( $\beta = 0.6$ )                                       | 0.77 $\pm$ 0.03 | 7.94 $\pm$ 2.91                | 0.90 $\pm$ 0.01                |
|          | Focal                                                           | 0.71 $\pm$ 0.03 | 9.25 $\pm$ 2.05                | 0.89 $\pm$ 0.01                |
|          | $\overline{\text{CEDice+CEDice}}$<br>$\overline{\text{CEDice}}$ | 0.76 $\pm$ 0.04 | 7.95 $\pm$ 2.21                | 0.91 $\pm$ 0.01                |
| IHC-TMA  | CEDice                                                          | 0.79 $\pm$ 0.04 | 3.31 $\pm$ 1.58                | 0.88 $\pm$ 0.01                |
|          | TopoLoss                                                        | 0.36 $\pm$ 0.0  | 7.49 $\pm$ 3.36                | 0.78 $\pm$ 0.03                |
|          | RWLoss                                                          | 0.78 $\pm$ 0.05 | 2.33 $\pm$ 1.36                | 0.87 $\pm$ 0.01                |
|          | Tversky ( $\beta = 0.9$ )                                       | 0.81 $\pm$ 0.04 | 2.64 $\pm$ 1.32                | 0.88 $\pm$ 0.01                |
|          | Focal                                                           | 0.77 $\pm$ 0.04 | 2.33 $\pm$ 1.22                | 0.87 $\pm$ 0.01                |
|          | $\overline{\text{CEDice+CEDice}}$<br>$\overline{\text{CEDice}}$ | 0.82 $\pm$ 0.04 | 2.39 $\pm$ 1.24                | 0.89 $\pm$ 0.01                |
| LyNSeC   | CEDice                                                          | 0.88 $\pm$ 0.0  | 10.23 $\pm$ 3.94               | 0.91 $\pm$ 0.0                 |
|          | TopoLoss                                                        | 0.47 $\pm$ 0.0  | 34.44 $\pm$ 19.91              | 0.73 $\pm$ 0.05                |
|          | RWLoss                                                          | 0.84 $\pm$ 0.01 | 10.56 $\pm$ 5.04               | 0.91 $\pm$ 0.0                 |
|          | Tversky ( $\beta = 0.6$ )                                       | 0.88 $\pm$ 0.0  | 9.47 $\pm$ 3.53                | 0.91 $\pm$ 0.0                 |
|          | Focal                                                           | 0.86 $\pm$ 0.01 | 10.10 $\pm$ 3.92               | 0.90 $\pm$ 0.0                 |
|          | $\overline{\text{CEDice+CEDice}}$<br>$\overline{\text{CEDice}}$ | 0.88 $\pm$ 0.0  | 9.75 $\pm$ 3.42                | <b>0.92<math>\pm</math>0.0</b> |
|          | 0.88 $\pm$ 0.0                                                  | 9.91 $\pm$ 3.33 | <b>0.92<math>\pm</math>0.0</b> |                                |

Table I.12. Group ④ Medical datasets with rounded structures.

## J. Segmentation examples

Figures J.3 to J.6 illustrates the segmentations provided by our SCNP and other loss functions. For each group we show the segmentations obtained by optimizing CEDice loss and the top three loss functions.

## K. Sensitivity analysis: extra metrics

Table K.13 and Table K.14 show the Dice and cIDice metrics of the sensitivity analysis.

| $\downarrow w$ | 9.69             | 7.23             | 4.70             |
|----------------|------------------|------------------|------------------|
| 3              | $0.92_{\pm 0.0}$ | $0.92_{\pm 0.0}$ | $0.92_{\pm 0.0}$ |
| 5              | $0.92_{\pm 0.0}$ | $0.92_{\pm 0.0}$ | $0.92_{\pm 0.0}$ |
| 7              | $0.92_{\pm 0.0}$ | $0.91_{\pm 0.0}$ | $0.91_{\pm 0.0}$ |
| 9              | $0.9_{\pm 0.0}$  | $0.89_{\pm 0.0}$ | $0.9_{\pm 0.0}$  |
| 11             | $0.92_{\pm 0.0}$ | $0.91_{\pm 0.0}$ | $0.92_{\pm 0.0}$ |

Table K.13. Dice coefficients of the sensitivity analysis on SCNP's hyper-parameter  $w$ .

| $\downarrow w$ | 9.69             | 7.23             | 4.70             |
|----------------|------------------|------------------|------------------|
| 3              | $0.92_{\pm 0.0}$ | $0.92_{\pm 0.0}$ | $0.92_{\pm 0.0}$ |
| 5              | $0.91_{\pm 0.0}$ | $0.91_{\pm 0.0}$ | $0.92_{\pm 0.0}$ |
| 7              | $0.9_{\pm 0.0}$  | $0.89_{\pm 0.0}$ | $0.9_{\pm 0.0}$  |
| 9              | $0.88_{\pm 0.0}$ | $0.87_{\pm 0.0}$ | $0.88_{\pm 0.0}$ |
| 11             | $0.91_{\pm 0.0}$ | $0.91_{\pm 0.0}$ | $0.92_{\pm 0.0}$ |

Table K.14. cIDice metric of the sensitivity analysis on SCNP's hyper-parameter  $w$ .

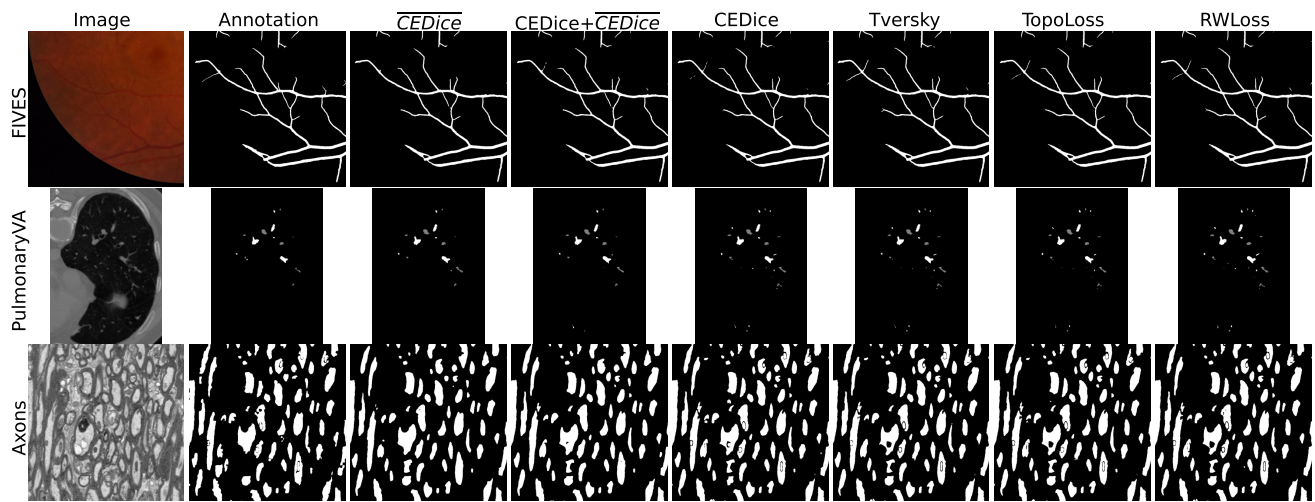

Figure J.3. Results on medical datasets with tubular structures (Group ①).

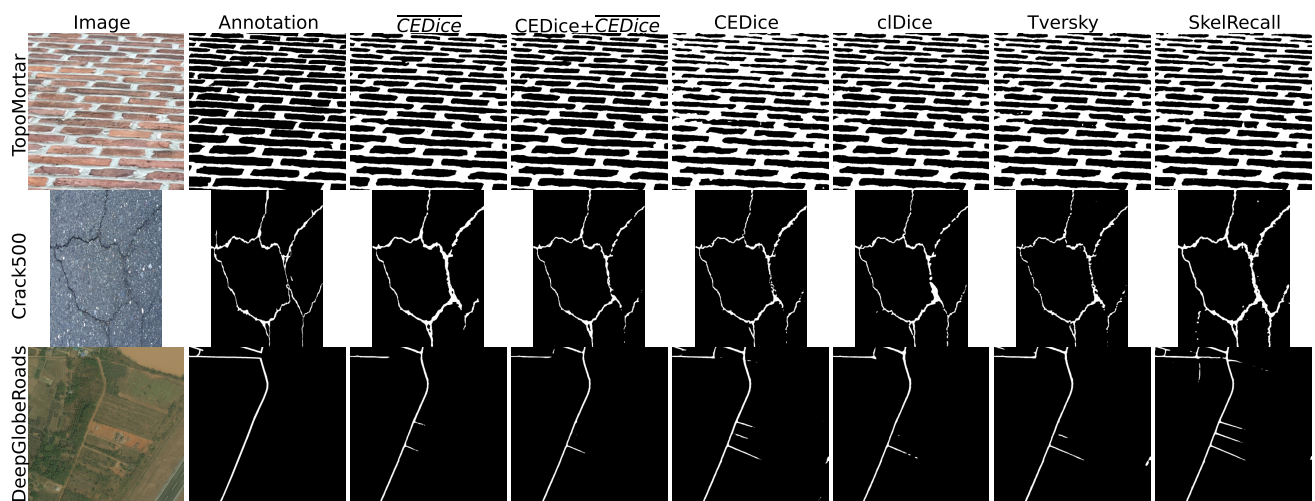

Figure J.4. Results on non-medical datasets with tubular structures (Group ②).

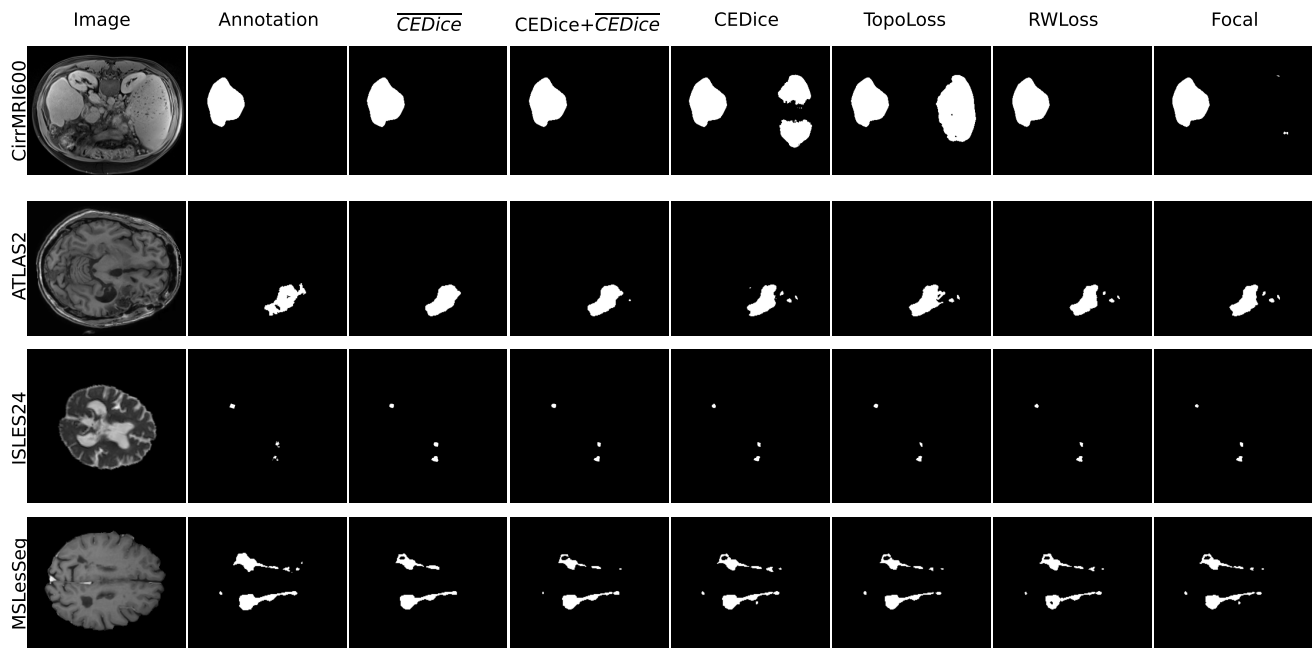

Figure J.5. Results on medical datasets with non-tubular structures (Group ③).

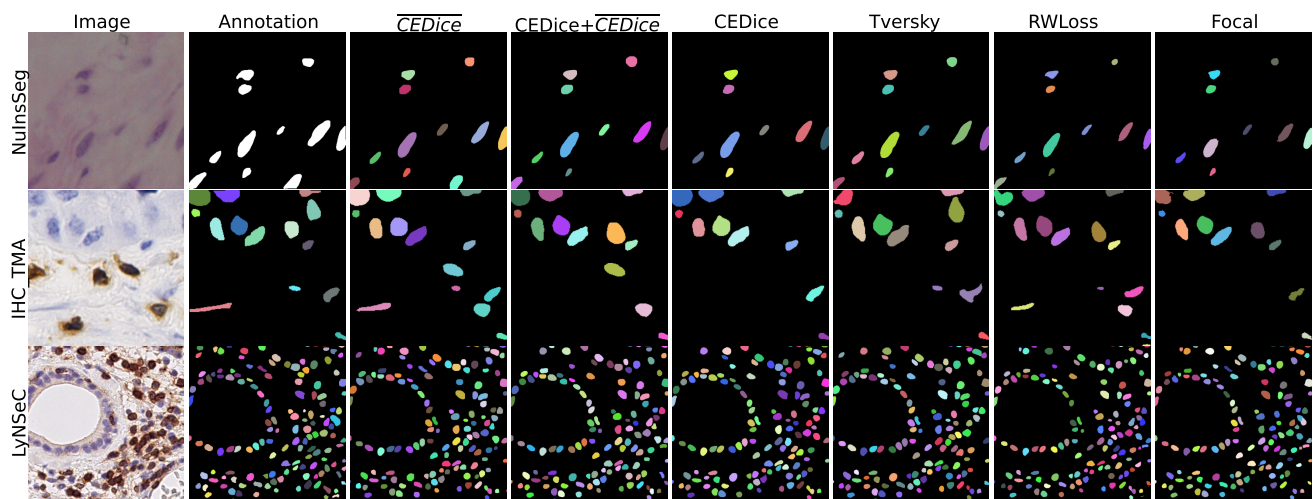

Figure J.6. Results on medical datasets with rounded structures (Group ④).
